# Supplementary material for: Prediction of Consolidation Tumor Ratio on Planning CT Images of Lung Cancer Patients Treated with Radiotherapy Based on Deep Learning
Source: MDPI journal article supplement (doi:10.3390/app14083275), 2024-04-13
Supplement: s1 [file s1]

**Table S1.** DSCs for three types of lung tumors (solid, part-solid, pure GGO) and all types using dense V-Net for internal test dataset A and external test dataset.

| Method      | Internal test dataset B<br>(n=38) |            |            |            | External test<br>dataset<br>(n=49) |
|-------------|-----------------------------------|------------|------------|------------|------------------------------------|
|             | Pure GGO                          | Part-solid | Solid      | All type   |                                    |
| Dense V-Net | 0.824±0.03                        | 0.784±0.09 | 0.828±0.08 | 0.810±0.08 | 0.776±0.107)                       |

**Table S2.** Hyper-parameters for Dense V-Net.

| Hyperparameters | Dense V-Net |
|-----------------|-------------|
| Learning rate   | 0.01        |
| Batch size      | 16          |
| Iterations      | 2150        |
