# Supplementary material for: Prediction of Consolidation Tumor Ratio on Planning CT Images of Lung Cancer Patients Treated with Radiotherapy Based on Deep Learning
Source: MDPI journal article supplement (doi:10.3390/app14083275), 2024-04-13
Supplement: s1 [file s1]

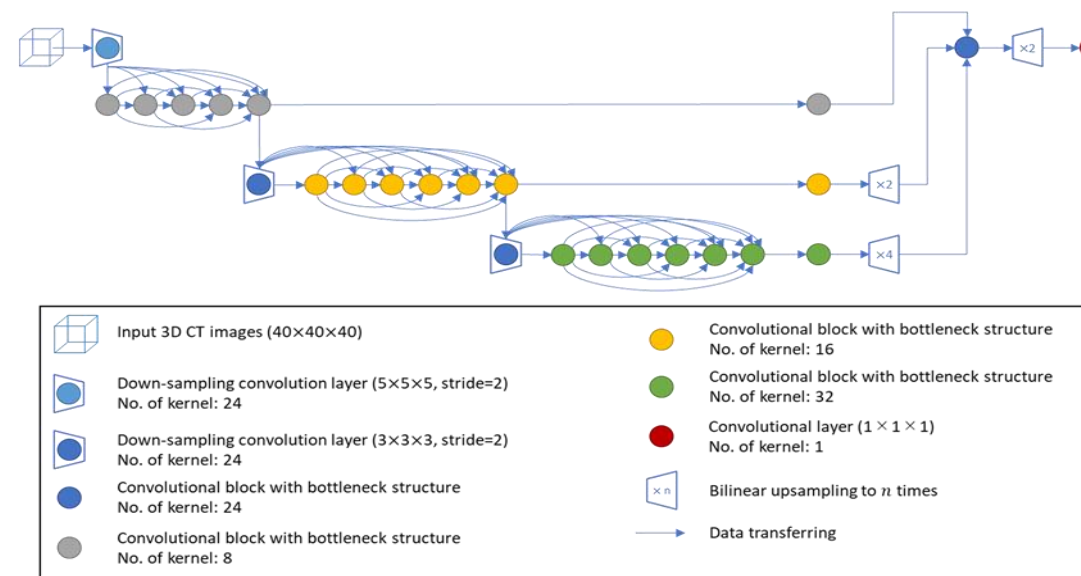

**Figure S1.** Architectures of a deep learning segmentation (DLS) model (dense V-Net).

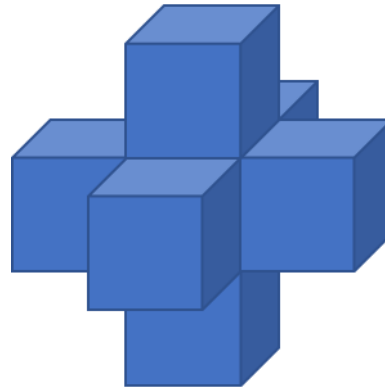

6-connectivity

**Figure S2.** Visualization of 6-connectivity.

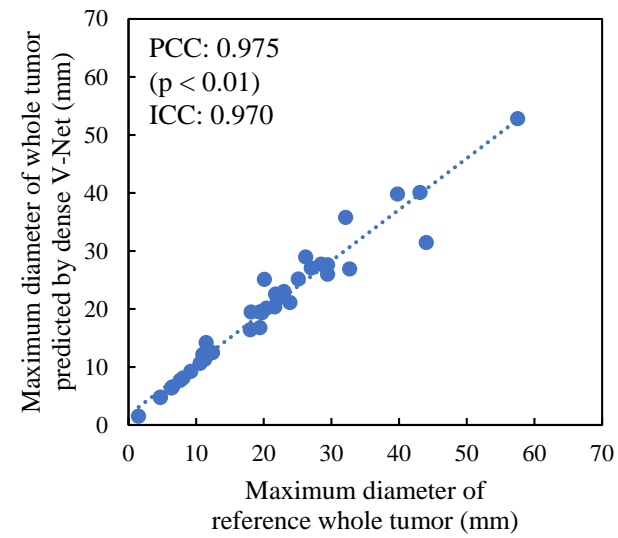

**Figure S3.** Correlation between reference and predicted maximum diameters of whole tumor regions with the proposed model for an internal test dataset B. PCC: Pearson correlation coefficient, ICC: Intraclass correlation coefficient.

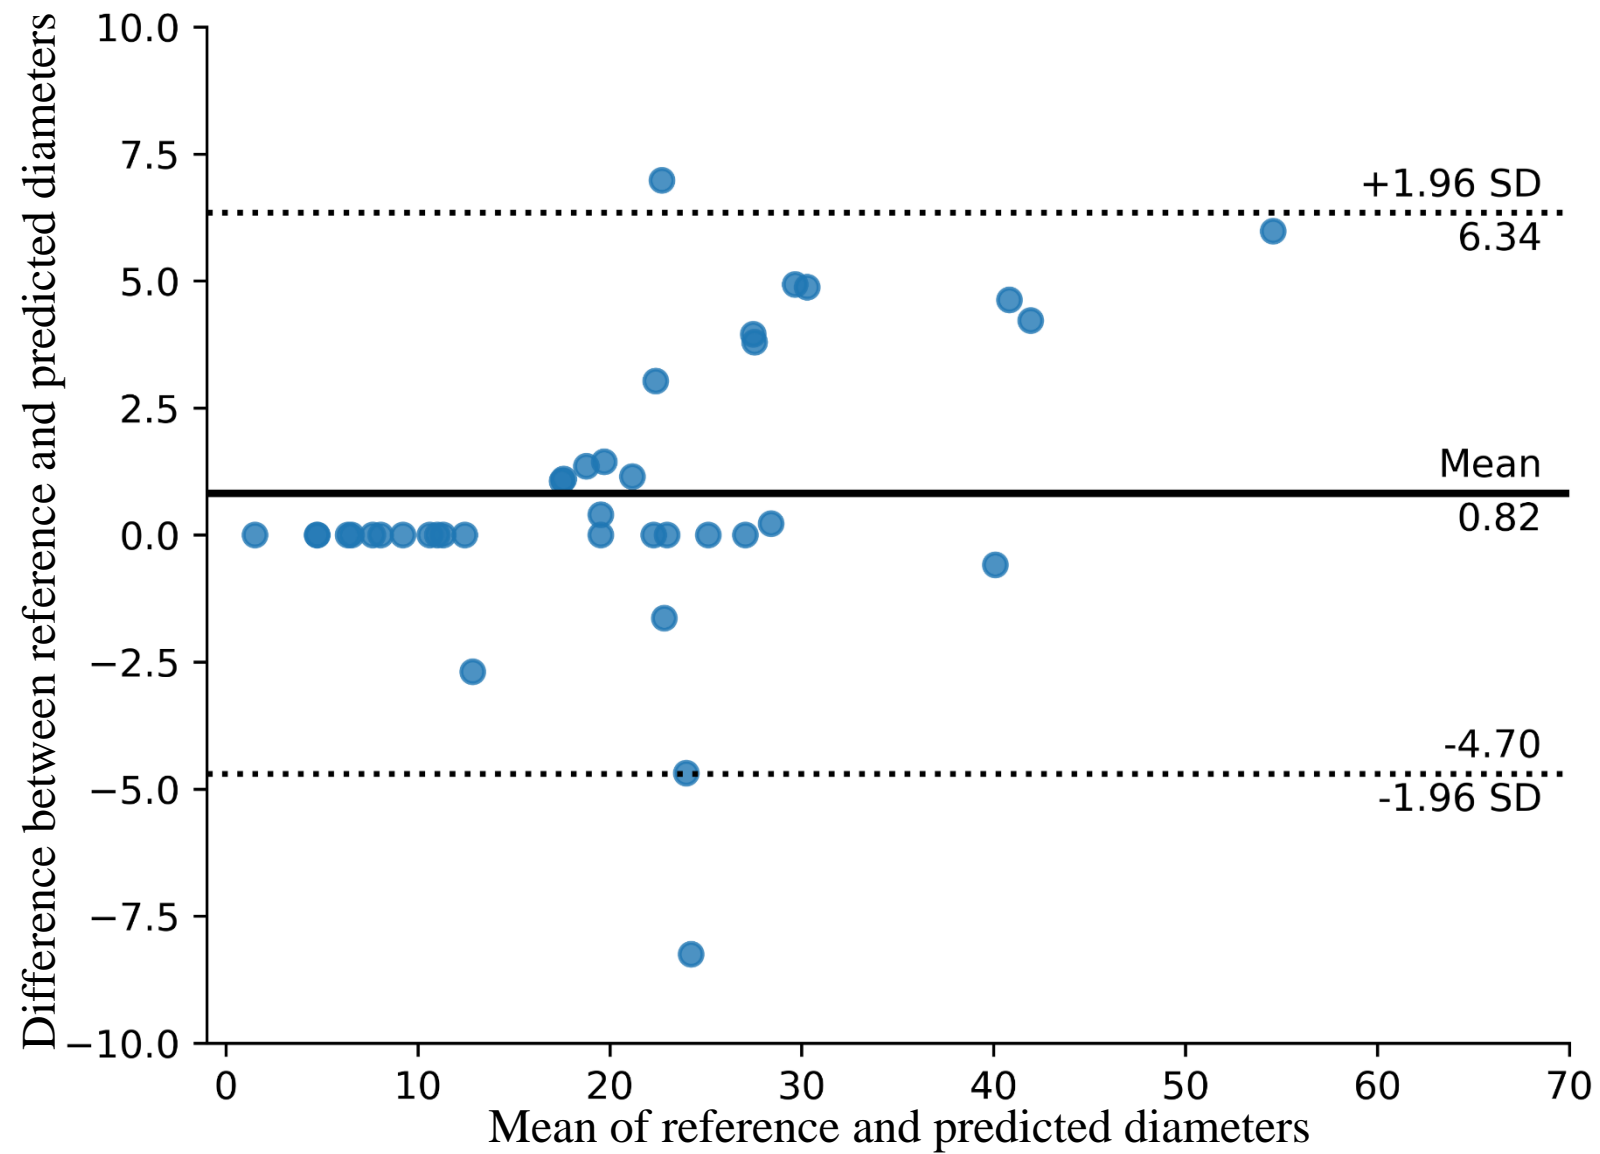

**Figure S4.** Bland-Altman plot of reference and predicted maximum diameters of whole tumor regions with the proposed model for an internal test dataset B.

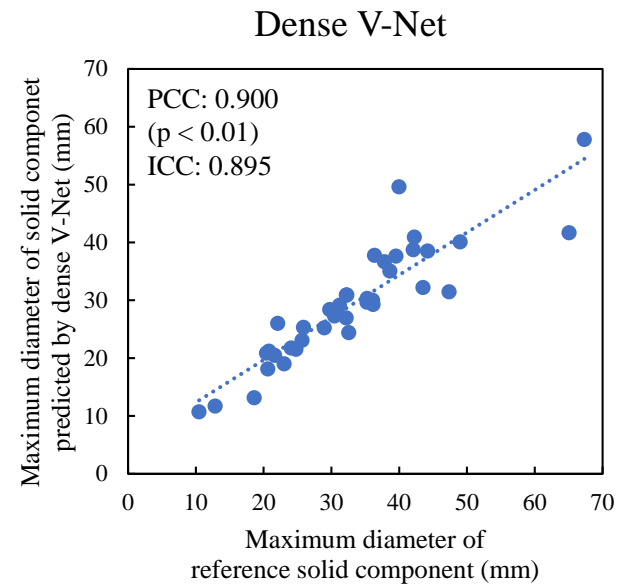

**Figure S5.** Correlation between reference and predicted maximum diameters of solid components with the proposed model for an internal test dataset B. PCC: Pearson correlation coefficient, ICC: Intraclass correlation coefficient.

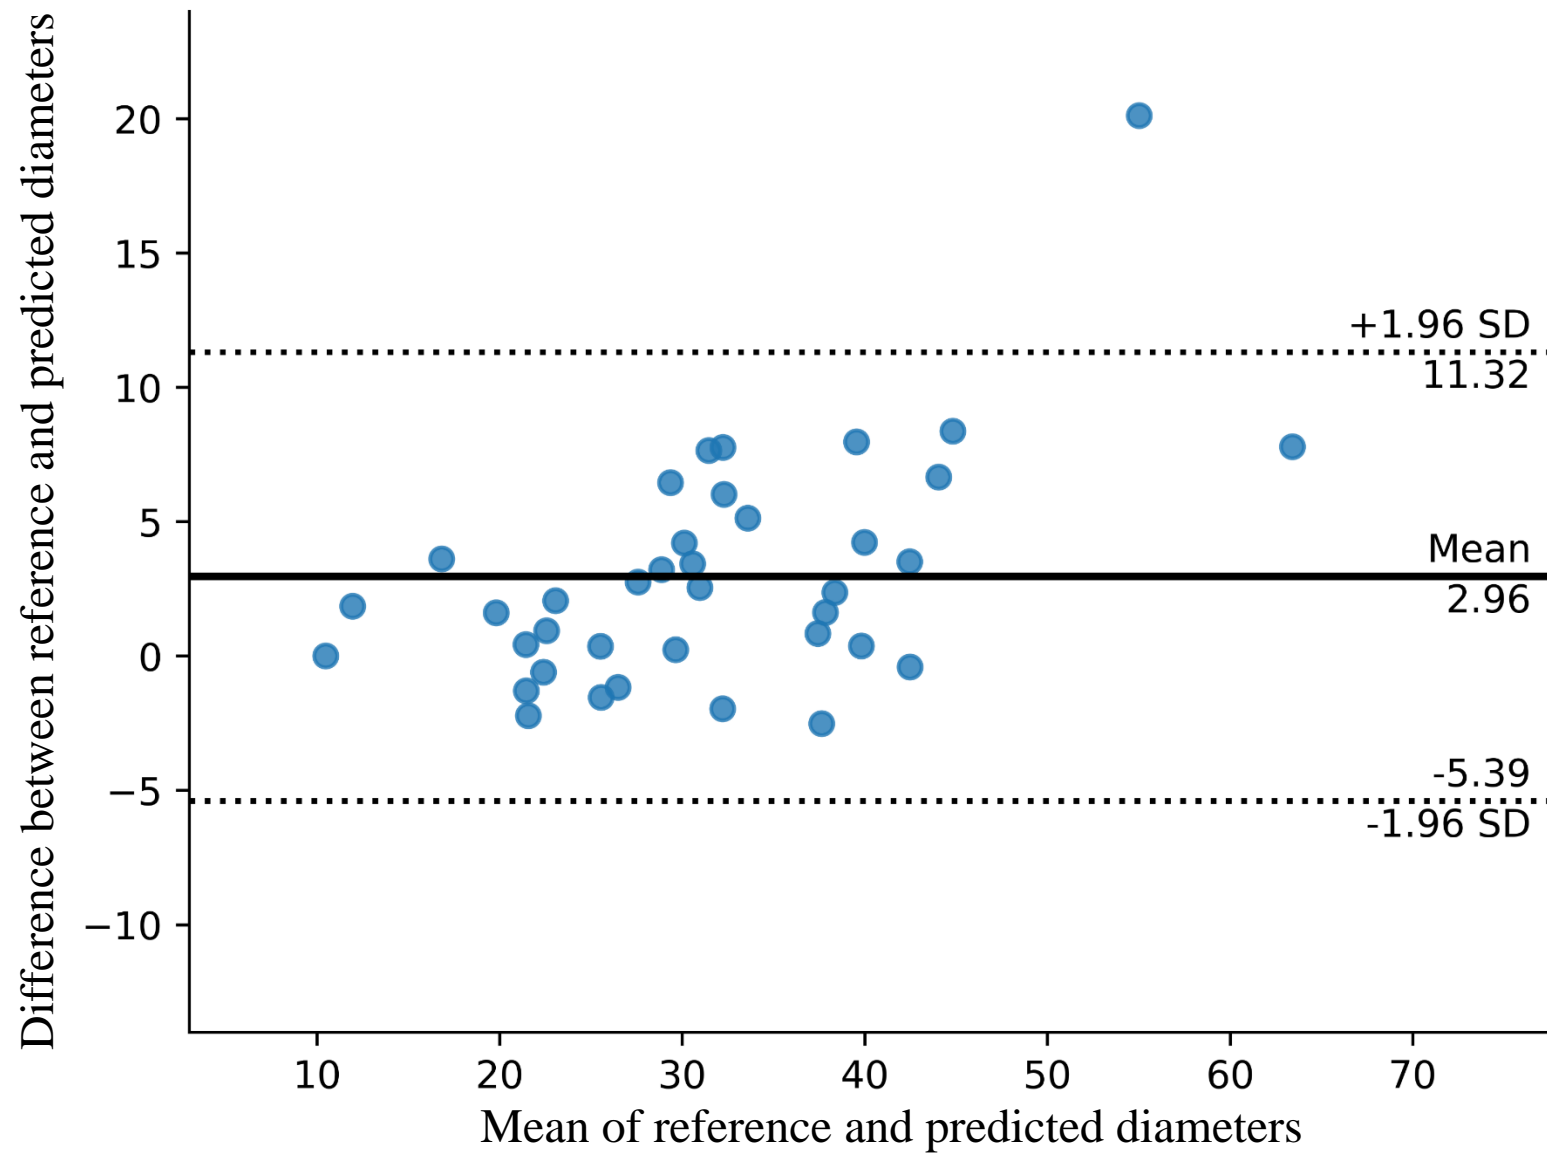

**Figure S6.** Bland-Altman plot of reference and predicted maximum diameters of solid components with the proposed model for an internal test dataset B.

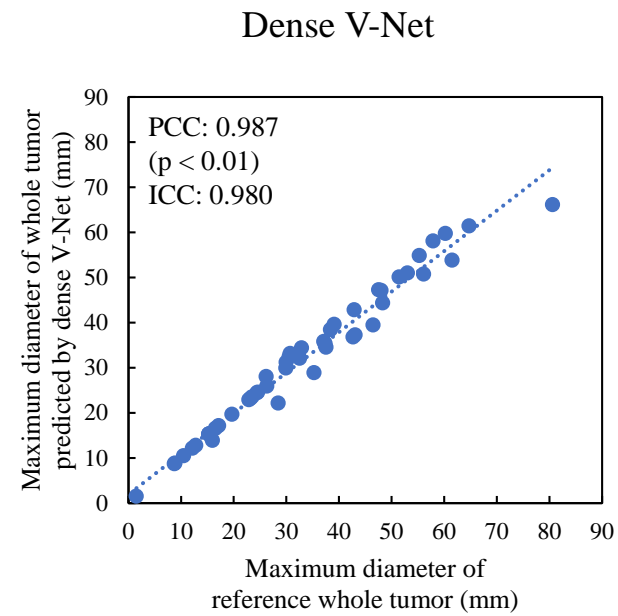

**Figure S7.** Correlation between reference and predicted maximum diameters of whole tumor regions with the proposed model for an external test dataset. PCC: Pearson correlation coefficient, ICC: Intraclass correlation coefficient.

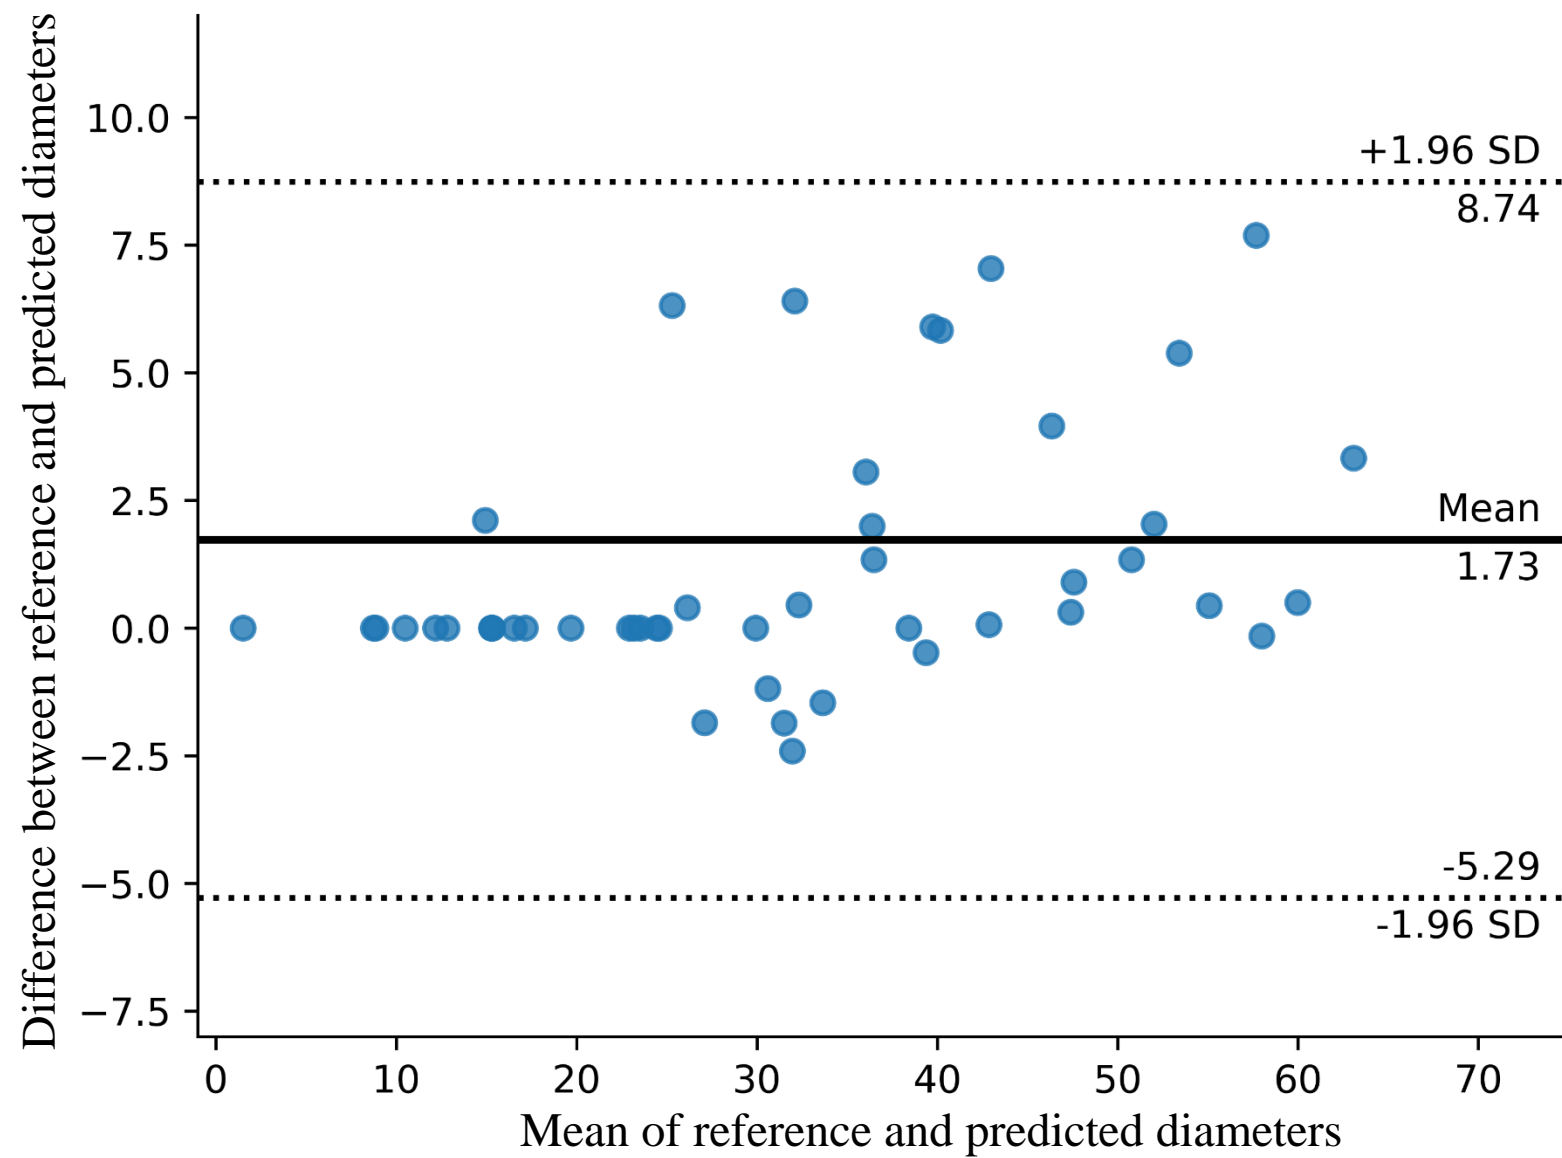

**Figure S8.** Bland-Altman plot of reference and predicted maximum diameters of whole tumor regions with the proposed model for an external test dataset.



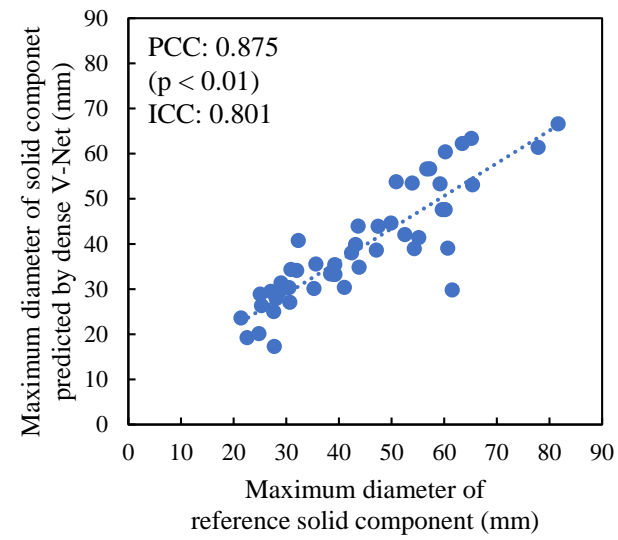

**Figure S9.** Correlation between reference and predicted maximum diameters of solid components with the proposed model for an external test dataset. PCC: Pearson correlation coefficient, ICC: Intraclass correlation coefficient.

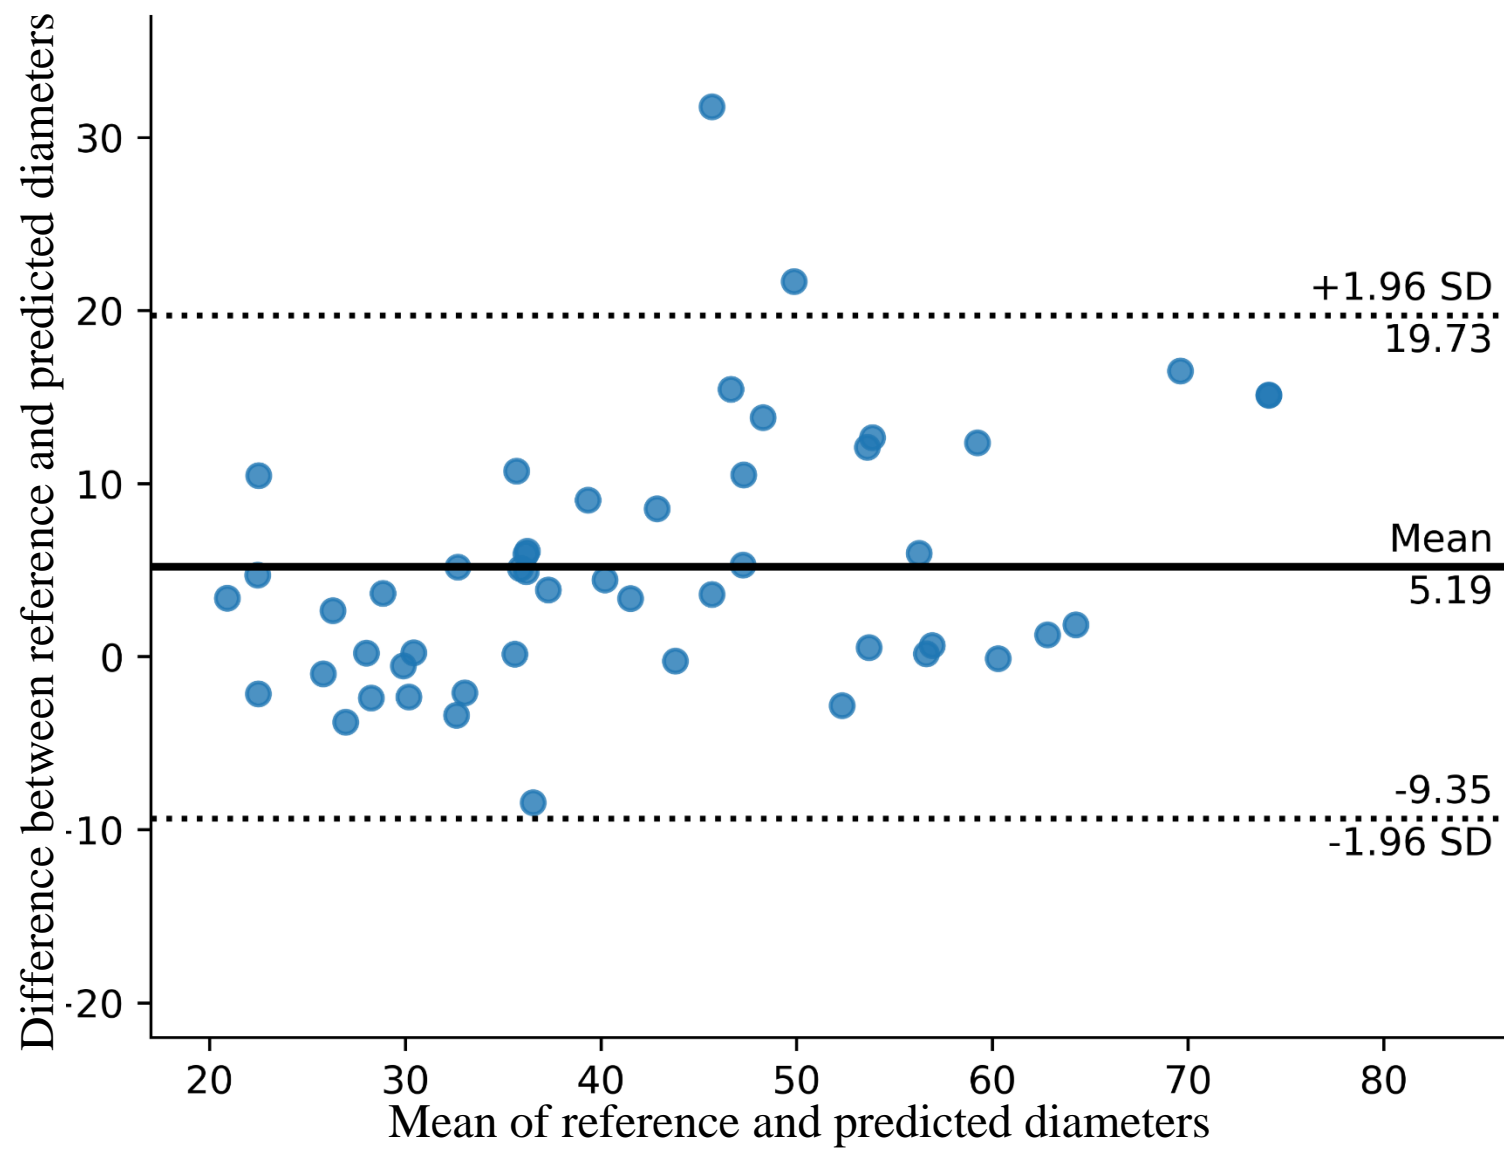

**Figure S10.** Bland-Altman plot of reference and predicted maximum diameters of solid components with the proposed model for an external test dataset.
